# Supplementary material for: Effect of Radiant Catalytic Ionization and Ozonation on Salmonella spp. on Eggshells
Source: MDPI journal article supplement (doi:10.3390/foods11162452), 2022-08-14
Supplement: s1 [file s1]

**Table S1.** The changes in the number of *S. Enteritidis*, *S. Typhimurim*, *S. Virchow* on eggshells contaminated with bacterial suspension of  $10^3$  CFU with or without the addition of poultry manure.

|         |                                                                  | <i>S. Enteritidis</i>                 | <i>S. Typhimurim</i>                | <i>S. Virchow</i>                   |
|---------|------------------------------------------------------------------|---------------------------------------|-------------------------------------|-------------------------------------|
| Variant |                                                                  | Average [log CFU/egg]<br><i>STD</i> * | Average [log CFU/egg]<br><i>STD</i> | Average [log CFU/egg]<br><i>STD</i> |
| 4°C     | <b>Bacterial suspension <math>10^3</math> CFU</b>                |                                       |                                     |                                     |
|         | Control                                                          | 1.51 ( $\pm 0.09$ )                   | 1.59 ( $\pm 0.06$ )                 | 1.67 ( $\pm 0.10$ )                 |
|         | 30 min. †                                                        | RCI                                   | 0.02 ( $\pm 0.06$ )                 | 0.21 ( $\pm 0.08$ )                 |
|         |                                                                  | Ozonizer                              | 0.26 ( $\pm 0.03$ )                 | 0.23 ( $\pm 0.04$ )                 |
|         |                                                                  | Fan                                   | 0.58 ( $\pm 0.00$ )                 | 0.30 ( $\pm 0.04$ )                 |
|         | 60 min.                                                          | RCI                                   | 0.00 ( $\pm 0.00$ )                 | 0.00 ( $\pm 0.00$ )                 |
|         |                                                                  | Ozonizer                              | 0.00 ( $\pm 0.00$ )                 | 0.00 ( $\pm 0.00$ )                 |
|         |                                                                  | Fan                                   | 0.00 ( $\pm 0.00$ )                 | 0.00 ( $\pm 0.00$ )                 |
|         | 120 min.                                                         | RCI                                   | 0.00 ( $\pm 0.00$ )                 | 0.00 ( $\pm 0.00$ )                 |
|         |                                                                  | Ozonizer                              | 0.00 ( $\pm 0.00$ )                 | 0.00 ( $\pm 0.00$ )                 |
|         |                                                                  | Fan                                   | 0.00 ( $\pm 0.00$ )                 | 0.00 ( $\pm 0.00$ )                 |
|         | <b>Bacterial suspension <math>10^3</math> and poultry manure</b> |                                       |                                     |                                     |
|         | Control                                                          | 1.60 ( $\pm 0.10$ )                   | 1.67 ( $\pm 0.07$ )                 | 1.74 ( $\pm 0.09$ )                 |
|         | 30 min.                                                          | RCI                                   | 0.23 ( $\pm 0.04$ )                 | 0.38 ( $\pm 0.06$ )                 |
|         |                                                                  | Ozonizer                              | 0.54 ( $\pm 0.01$ )                 | 0.56 ( $\pm 0.03$ )                 |
|         |                                                                  | Fan                                   | 0.92 ( $\pm 0.03$ )                 | 0.86 ( $\pm 0.00$ )                 |
|         | 60 min.                                                          | RCI                                   | 0.00 ( $\pm 0.00$ )                 | 0.00 ( $\pm 0.00$ )                 |
|         |                                                                  | Ozonizer                              | 0.00 ( $\pm 0.00$ )                 | 0.00 ( $\pm 0.00$ )                 |
|         |                                                                  | Fan                                   | 0.00 ( $\pm 0.00$ )                 | 0.00 ( $\pm 0.00$ )                 |
|         | 120 min.                                                         | RCI                                   | 0.00 ( $\pm 0.00$ )                 | 0.00 ( $\pm 0.00$ )                 |
|         |                                                                  | Ozonizer                              | 0.00 ( $\pm 0.00$ )                 | 0.00 ( $\pm 0.00$ )                 |
|         |                                                                  | Fan                                   | 0.00 ( $\pm 0.00$ )                 | 0.00 ( $\pm 0.00$ )                 |
| 20°C    | <b>Bacterial suspension <math>10^3</math> CFU</b>                |                                       |                                     |                                     |
|         | Control                                                          | 1.51 ( $\pm 0.09$ )                   | 1.59 ( $\pm 0.06$ )                 | 1.67 ( $\pm 0.10$ )                 |
|         | 30 min.                                                          | RCI                                   | 0.00 ( $\pm 0.00$ )                 | 0.09 ( $\pm 0.09$ )                 |
|         |                                                                  | Ozonizer                              | 0.33 ( $\pm 0.02$ )                 | 0.32 ( $\pm 0.00$ )                 |
|         |                                                                  | Fan                                   | 0.57 ( $\pm 0.00$ )                 | 0.27 ( $\pm 0.00$ )                 |
|         | 60 min.                                                          | RCI                                   | 0.00 ( $\pm 0.00$ )                 | 0.00 ( $\pm 0.00$ )                 |
|         |                                                                  | Ozonizer                              | 0.00 ( $\pm 0.00$ )                 | 0.00 ( $\pm 0.00$ )                 |
|         |                                                                  | Fan                                   | 0.00 ( $\pm 0.00$ )                 | 0.00 ( $\pm 0.00$ )                 |
|         | 120 min.                                                         | RCI                                   | 0.00 ( $\pm 0.00$ )                 | 0.00 ( $\pm 0.00$ )                 |
|         |                                                                  | Ozonizer                              | 0.00 ( $\pm 0.00$ )                 | 0.00 ( $\pm 0.00$ )                 |
|         |                                                                  | Fan                                   | 0.00 ( $\pm 0.00$ )                 | 0.00 ( $\pm 0.00$ )                 |
|         | <b>Bacterial suspension <math>10^3</math> and poultry manure</b> |                                       |                                     |                                     |
|         | Control                                                          | 1.60 ( $\pm 0.01$ )                   | 1.67 ( $\pm 0.07$ )                 | 1.74 ( $\pm 0.09$ )                 |
|         | 30 min.                                                          | RCI                                   | 0.15 ( $\pm 0.05$ )                 | 0.11 ( $\pm 0.07$ )                 |

|          |          | S. Enteritidis                   | S.<br>Typhimurium               | S. Virchow                         |
|----------|----------|----------------------------------|---------------------------------|------------------------------------|
| Variant  |          | Average [log<br>CFU/egg]<br>STD* | Average [log<br>CFU/egg]<br>STD | Average<br>[log<br>CFU/egg]<br>STD |
| 60 min.  | Ozonizer | 0.61 ( $\pm 0.00$ )              | 0.80 ( $\pm 0.02$ )             | 0.66 ( $\pm 0.02$ )                |
|          | Fan      | 0.94 ( $\pm 0.03$ )              | 1.10 ( $\pm 0.01$ )             | 0.90 ( $\pm 0.00$ )                |
|          | RCI      | 0.00 ( $\pm 0.00$ )              | 0.00 ( $\pm 0.00$ )             | 0.00 ( $\pm 0.00$ )                |
|          | Ozonizer | 0.00 ( $\pm 0.00$ )              | 0.00 ( $\pm 0.00$ )             | 0.00 ( $\pm 0.00$ )                |
|          | Fan      | 0.00 ( $\pm 0.00$ )              | 0.00 ( $\pm 0.00$ )             | 0.00 ( $\pm 0.00$ )                |
|          | RCI      | 0.00 ( $\pm 0.00$ )              | 0.00 ( $\pm 0.00$ )             | 0.00 ( $\pm 0.00$ )                |
| 120 min. | Ozonizer | 0.00 ( $\pm 0.00$ )              | 0.00 ( $\pm 0.00$ )             | 0.00 ( $\pm 0.00$ )                |
|          | Fan      | 0.00 ( $\pm 0.00$ )              | 0.00 ( $\pm 0.00$ )             | 0.00 ( $\pm 0.00$ )                |
|          | RCI      | 0.00 ( $\pm 0.00$ )              | 0.00 ( $\pm 0.00$ )             | 0.00 ( $\pm 0.00$ )                |

\* - standard deviation, † - time of action; CFU – colony forming units
