# Supplementary material for: Effect of Radiant Catalytic Ionization and Ozonation on Salmonella spp. on Eggshells
Source: MDPI journal article supplement (doi:10.3390/foods11162452), 2022-08-14
Supplement: s1 [file s1]

**Table S2.** The changes in the number of *S. Enteritidis*, *S. Typhimurim*, *S. Virchow* on eggshells contaminated with bacterial suspension of  $10^5$  CFU with or without the addition of poultry manure.

| Variant |                                                                  |          | S.<br>Enteritidis                  | S.<br>Typhimurium                 | S. Virchow                        |
|---------|------------------------------------------------------------------|----------|------------------------------------|-----------------------------------|-----------------------------------|
|         |                                                                  |          | Average [log<br>CFU/egg]<br>(STD)* | Average [log<br>CFU/egg]<br>(STD) | Average [log<br>CFU/egg]<br>(STD) |
| 4°C     | <b>Bacterial suspension <math>10^5</math> CFU</b>                |          |                                    |                                   |                                   |
|         | Control                                                          |          | 2.74 ( $\pm 0.20$ )                | 2.34 ( $\pm 0.22$ )               | 2.88 ( $\pm 0.21$ )               |
|         | 30 min.                                                          | RCI      | 1.52 ( $\pm 0.07$ )                | 1.30 ( $\pm 0.11$ )               | 1.30 ( $\pm 0.05$ )               |
|         |                                                                  | Ozonizer | 1.63 ( $\pm 0.08$ )                | 1.41 ( $\pm 0.13$ )               | 1.55 ( $\pm 0.08$ )               |
|         |                                                                  | Fan      | 2.42 ( $\pm 0.20$ )                | 2.04 ( $\pm 0.19$ )               | 2.36 ( $\pm 0.16$ )               |
|         | 60 min.                                                          | RCI      | 0.78 ( $\pm 0.00$ )                | 0.45 ( $\pm 0.04$ )               | 0.89 ( $\pm 0.00$ )               |
|         |                                                                  | Ozonizer | 0.74 ( $\pm 0.00$ )                | 0.55 ( $\pm 0.04$ )               | 0.69 ( $\pm 0.01$ )               |
|         |                                                                  | Fan      | 2.25 ( $\pm 0.14$ )                | 1.92 ( $\pm 0.18$ )               | 1.51 ( $\pm 0.07$ )               |
|         | 120 min.                                                         | RCI      | 0.59 ( $\pm 0.02$ )                | 0.04 ( $\pm 0.00$ )               | 0.88 ( $\pm 0.00$ )               |
|         |                                                                  | Ozonizer | 0.91 ( $\pm 0.01$ )                | 0.06 ( $\pm 0.00$ )               | 0.58 ( $\pm 0.02$ )               |
|         |                                                                  | Fan      | 1.55 ( $\pm 0.07$ )                | 1.40 ( $\pm 0.13$ )               | 0.07 ( $\pm 0.09$ )               |
|         | <b>Bacterial suspension <math>10^5</math> and poultry manure</b> |          |                                    |                                   |                                   |
|         | Control                                                          |          | 2.81 ( $\pm 0.20$ )                | 2.51 ( $\pm 0.18$ )               | 2.92 ( $\pm 0.21$ )               |
|         | 30 min.                                                          | RCI      | 2.51 ( $\pm 0.17$ )                | 2.28 ( $\pm 0.15$ )               | 2.55 ( $\pm 0.17$ )               |
|         |                                                                  | Ozonizer | 2.52 ( $\pm 0.17$ )                | 2.30 ( $\pm 0.16$ )               | 2.57 ( $\pm 0.17$ )               |
|         |                                                                  | Fan      | 2.68 ( $\pm 0.19$ )                | 2.43 ( $\pm 0.17$ )               | 2.74 ( $\pm 0.19$ )               |
|         | 60 min.                                                          | RCI      | 2.39 ( $\pm 0.16$ )                | 2.20 ( $\pm 0.13$ )               | 2.45 ( $\pm 0.16$ )               |
|         |                                                                  | Ozonizer | 2.41 ( $\pm 0.16$ )                | 2.22 ( $\pm 0.15$ )               | 2.44 ( $\pm 0.16$ )               |
|         |                                                                  | Fan      | 2.58 ( $\pm 0.18$ )                | 2.36 ( $\pm 0.17$ )               | 2.66 ( $\pm 0.18$ )               |
|         | 120 min.                                                         | RCI      | 2.19 ( $\pm 0.20$ )                | 2.02 ( $\pm 0.18$ )               | 2.25 ( $\pm 0.14$ )               |
|         |                                                                  | Ozonizer | 2.14 ( $\pm 0.13$ )                | 2.05 ( $\pm 0.13$ )               | 2.28 ( $\pm 0.15$ )               |
|         |                                                                  | Fan      | 2.44 ( $\pm 0.16$ )                | 2.22 ( $\pm 0.15$ )               | 2.47 ( $\pm 0.16$ )               |
| 20°C    | <b>Bacterial suspension <math>10^5</math> CFU</b>                |          |                                    |                                   |                                   |
|         | Control                                                          |          | 2.74 ( $\pm 0.19$ )                | 2.34 ( $\pm 0.22$ )               | 2.88 ( $\pm 0.21$ )               |
|         | 30 min.                                                          | RCI      | 1.44 ( $\pm 0.06$ )                | 1.24 ( $\pm 0.11$ )               | 1.18 ( $\pm 0.04$ )               |
|         |                                                                  | Ozonizer | 1.78 ( $\pm 0.10$ )                | 1.49 ( $\pm 0.14$ )               | 1.79 ( $\pm 0.10$ )               |
|         |                                                                  | Fan      | 2.43 ( $\pm 0.16$ )                | 2.05 ( $\pm 0.19$ )               | 2.36 ( $\pm 0.16$ )               |
|         | 60 min.                                                          | RCI      | 0.04 ( $\pm 0.08$ )                | 0.12 ( $\pm 0.00$ )               | 0.04 ( $\pm 0.19$ )               |
|         |                                                                  | Ozonizer | 1.38 ( $\pm 0.06$ )                | 1.04 ( $\pm 0.09$ )               | 0.04 ( $\pm 0.07$ )               |
|         |                                                                  | Fan      | 2.23 ( $\pm 0.14$ )                | 1.92 ( $\pm 0.18$ )               | 1.58 ( $\pm 0.08$ )               |
|         | 120 min.                                                         | RCI      | 0.00 ( $\pm 0.00$ )                | 0.00 ( $\pm 0.00$ )               | 0.00 ( $\pm 0.00$ )               |
|         |                                                                  | Ozonizer | 0.00 ( $\pm 0.00$ )                | 0.04 ( $\pm 0.08$ )               | 0.00 ( $\pm 0.00$ )               |
|         |                                                                  | Fan      | 1.59 ( $\pm 0.08$ )                | 1.38 ( $\pm 0.13$ )               | 0.93 ( $\pm 0.01$ )               |
|         | <b>Bacterial suspension <math>10^5</math> and poultry manure</b> |          |                                    |                                   |                                   |
|         | Control                                                          |          | 2.81 ( $\pm 0.20$ )                | 2.51 ( $\pm 0.18$ )               | 2.92 ( $\pm 0.21$ )               |
|         | 30 min.                                                          | RCI      | 2.49 ( $\pm 0.17$ )                | 2.27 ( $\pm 0.16$ )               | 2.53 ( $\pm 0.17$ )               |
|         |                                                                  | Ozonizer | 2.54 ( $\pm 0.17$ )                | 2.32 ( $\pm 0.16$ )               | 2.60 ( $\pm 0.18$ )               |
|         |                                                                  | Fan      | 2.68 ( $\pm 0.19$ )                | 2.42 ( $\pm 0.17$ )               | 2.74 ( $\pm 0.19$ )               |
|         | 60 min.                                                          | RCI      | 2.37 ( $\pm 0.16$ )                | 2.18 ( $\pm 0.15$ )               | 0.04 ( $\pm 0.16$ )               |

|          | Variant  | S.<br>Enteritidis                  | S.<br>Typhimurium                 | S. Virchow                        |
|----------|----------|------------------------------------|-----------------------------------|-----------------------------------|
|          |          | Average [log<br>CFU/egg]<br>(STD)* | Average [log<br>CFU/egg]<br>(STD) | Average [log<br>CFU/egg]<br>(STD) |
|          |          |                                    |                                   |                                   |
| 120 min. | Ozonizer | 2.44 ( $\pm 0.16$ )                | 2.24 ( $\pm 0.15$ )               | 0.04 ( $\pm 0.16$ )               |
|          | Fan      | 2.58 ( $\pm 0.18$ )                | 2.36 ( $\pm 0.17$ )               | 2.66 ( $\pm 0.18$ )               |
|          | RCI      | 0.00 ( $\pm 0.00$ )                | 0.00 ( $\pm 0.00$ )               | 0.00 ( $\pm 0.00$ )               |
|          | Ozonizer | 0.00 ( $\pm 0.00$ )                | 0.04 ( $\pm 0.14$ )               | 0.00 ( $\pm 0.00$ )               |
|          | Fan      | 2.45 ( $\pm 0.16$ )                | 2.22 ( $\pm 0.15$ )               | 2.48 ( $\pm 0.17$ )               |

\* - standard deviation, † - time of action; CFU – colony forming units
