# Supplementary material for: Effect of Radiant Catalytic Ionization and Ozonation on Salmonella spp. on Eggshells
Source: MDPI journal article supplement (doi:10.3390/foods11162452), 2022-08-14
Supplement: s1 [file s1]

**Table S3.** The changes in the number of *S. Enteritidis*, *S. Typhimurim*, *S. Virchow* on eggshells contaminated with bacterial suspension of  $10^8$  CFU with or without the addition of poultry manure.

|      | Variant                                                          | S.<br>Enteritidis                     | S.<br>Typhimurium                 | S. Virchow                        |
|------|------------------------------------------------------------------|---------------------------------------|-----------------------------------|-----------------------------------|
|      |                                                                  | Average<br>[log<br>CFU/egg]<br>(STD)* | Average [log<br>CFU/egg]<br>(STD) | Average [log<br>CFU/egg]<br>(STD) |
| 4°C  | <b>Bacterial suspension <math>10^8</math> CFU</b>                |                                       |                                   |                                   |
|      | Control                                                          | 5.80 ( $\pm 0.51$ )                   | 5.67 ( $\pm 0.51$ )               | 5.95 ( $\pm 0.50$ )               |
|      | 30 min.<br>+                                                     | RCI                                   | 4.82 ( $\pm 0.41$ )               | 4.77 ( $\pm 0.42$ )               |
|      |                                                                  | Ozonizer                              | 4.85 ( $\pm 0.41$ )               | 4.82 ( $\pm 0.43$ )               |
|      |                                                                  | Fan                                   | 5.55 ( $\pm 0.48$ )               | 5.43 ( $\pm 0.49$ )               |
|      | 60 min.                                                          | RCI                                   | 4.16 ( $\pm 0.34$ )               | 4.10 ( $\pm 0.35$ )               |
|      |                                                                  | Ozonizer                              | 4.58 ( $\pm 0.38$ )               | 4.58 ( $\pm 0.40$ )               |
|      |                                                                  | Fan                                   | 5.43 ( $\pm 0.47$ )               | 4.85 ( $\pm 0.39$ )               |
|      | 120 min.                                                         | RCI                                   | 3.91 ( $\pm 0.32$ )               | 3.82 ( $\pm 0.33$ )               |
|      |                                                                  | Ozonizer                              | 3.90 ( $\pm 0.31$ )               | 3.91 ( $\pm 0.40$ )               |
|      |                                                                  | Fan                                   | 5.05 ( $\pm 0.43$ )               | 4.36 ( $\pm 0.34$ )               |
|      | <b>Bacterial suspension <math>10^8</math> and poultry manure</b> |                                       |                                   |                                   |
|      | Control                                                          | 5.88 ( $\pm 0.50$ )                   | 5.81 ( $\pm 0.52$ )               | 5.98 ( $\pm 0.48$ )               |
|      | 30 min. +                                                        | RCI                                   | 5.63 ( $\pm 0.48$ )               | 5.65 ( $\pm 0.51$ )               |
|      |                                                                  | Ozonizer                              | 5.65 ( $\pm 0.48$ )               | 5.68 ( $\pm 0.51$ )               |
|      |                                                                  | Fan                                   | 5.80 ( $\pm 0.49$ )               | 5.83 ( $\pm 0.47$ )               |
|      | 60 min.                                                          | RCI                                   | 5.49 ( $\pm 0.46$ )               | 5.55 ( $\pm 0.50$ )               |
|      |                                                                  | Ozonizer                              | 5.53 ( $\pm 0.47$ )               | 5.55 ( $\pm 0.47$ )               |
|      |                                                                  | Fan                                   | 5.69 ( $\pm 0.48$ )               | 5.74 ( $\pm 0.46$ )               |
|      | 120 min.                                                         | RCI                                   | 5.33 ( $\pm 0.45$ )               | 5.40 ( $\pm 0.48$ )               |
|      |                                                                  | Ozonizer                              | 5.35 ( $\pm 0.45$ )               | 5.37 ( $\pm 0.48$ )               |
|      |                                                                  | Fan                                   | 5.49 ( $\pm 0.46$ )               | 5.48 ( $\pm 0.43$ )               |
| 20°C | <b>Bacterial suspension <math>10^8</math> CFU</b>                |                                       |                                   |                                   |
|      | Control                                                          | 5.80 ( $\pm 0.51$ )                   | 5.67 ( $\pm 0.51$ )               | 5.95 ( $\pm 0.50$ )               |
|      | 30 min.<br>+                                                     | RCI                                   | 4.75 ( $\pm 0.40$ )               | 4.71 ( $\pm 0.42$ )               |
|      |                                                                  | Ozonizer                              | 4.95 ( $\pm 0.42$ )               | 4.90 ( $\pm 0.43$ )               |
|      |                                                                  | Fan                                   | 5.55 ( $\pm 0.48$ )               | 5.44 ( $\pm 0.49$ )               |
|      | 60 min.                                                          | RCI                                   | 3.70 ( $\pm 0.30$ )               | 3.71 ( $\pm 0.32$ )               |
|      |                                                                  | Ozonizer                              | 4.75 ( $\pm 0.40$ )               | 4.71 ( $\pm 0.42$ )               |
|      |                                                                  | Fan                                   | 5.42 ( $\pm 0.47$ )               | 5.33 ( $\pm 0.48$ )               |
|      | 120 min.                                                         | RCI                                   | 2.10 ( $\pm 0.14$ )               | 2.75 ( $\pm 0.22$ )               |
|      |                                                                  | Ozonizer                              | 4.44 ( $\pm 0.37$ )               | 4.34 ( $\pm 0.38$ )               |
|      |                                                                  | Fan                                   | 5.08 ( $\pm 0.43$ )               | 4.43 ( $\pm 0.35$ )               |
|      | <b>Bacterial suspension <math>10^8</math> and poultry manure</b> |                                       |                                   |                                   |
|      | Control                                                          | 5.88 ( $\pm 0.50$ )                   | 5.81 ( $\pm 0.52$ )               | 5.98 ( $\pm 0.48$ )               |
|      | 30 min.<br>+                                                     | RCI                                   | 5.62 ( $\pm 0.48$ )               | 5.65 ( $\pm 0.51$ )               |
|      |                                                                  | Ozonizer                              | 5.67 ( $\pm 0.48$ )               | 5.69 ( $\pm 0.51$ )               |
|      |                                                                  | Fan                                   | 5.79 ( $\pm 0.49$ )               | 5.83 ( $\pm 0.47$ )               |

|          |          | S.<br>Enteritidis                     | S.<br>Typhimurium                 | S. Virchow                        |
|----------|----------|---------------------------------------|-----------------------------------|-----------------------------------|
| Variant  |          | Average<br>[log<br>CFU/egg]<br>(STD)* | Average [log<br>CFU/egg]<br>(STD) | Average [log<br>CFU/egg]<br>(STD) |
| 60 min.  | RCI      | 5.50 ( $\pm 0.46$ )                   | 5.53 ( $\pm 0.49$ )               | 5.52 ( $\pm 0.44$ )               |
|          | Ozonizer | 5.56 ( $\pm 0.47$ )                   | 5.59 ( $\pm 0.50$ )               | 5.58 ( $\pm 0.44$ )               |
|          | Fan      | 5.69 ( $\pm 0.48$ )                   | 5.69 ( $\pm 0.51$ )               | 5.73 ( $\pm 0.46$ )               |
| 120 min. | RCI      | 5.30 ( $\pm 0.44$ )                   | 5.38 ( $\pm 0.48$ )               | 5.36 ( $\pm 0.42$ )               |
|          | Ozonizer | 5.39 ( $\pm 0.45$ )                   | 5.40 ( $\pm 0.48$ )               | 5.42 ( $\pm 0.43$ )               |
|          | Fan      | 5.50 ( $\pm 0.46$ )                   | 5.53 ( $\pm 0.49$ )               | 5.48 ( $\pm 0.43$ )               |

\* - standard deviation, † - time of action; CFU – colony forming units
